# Supplementary material
Source: ML conference proceedings conference paper supplement (https://openreview.net/forum?id=xVU6rY37X9)
Supplement: supplementary_material [file attachment]

## A DATASET DESCRIPTION

### A.1 DATASET FOR SINGLE-TASK MODEL: iTRANSFORMER

For TS forecasting in a single-task setting, we evaluate the effectiveness of our proposed method using 13 datasets, with their statistics described in Table A.1. We adhere to the same data processing and train-validation-test split protocol as iTransformer (Liu et al., 2024a), ensuring that the training, validation, and test sets are separated in chronological order. The input length is consistently set to 96 across all datasets. Note that  $N$  and  $C$  denote the size of the dataset and number of channels in a dataset, respectively.

| Dataset                         | $C$ | Prediction Length   | $(N_{\text{train}}, N_{\text{val}}, N_{\text{test}})$ |
|---------------------------------|-----|---------------------|-------------------------------------------------------|
| ETTh1 (Zhou et al., 2021)       | 7   | {96, 192, 336, 720} | (8545, 2881, 2881)                                    |
| ETTh2 (Zhou et al., 2021)       | 7   | {96, 192, 336, 720} | (8545, 2881, 2881)                                    |
| ETTm1 (Zhou et al., 2021)       | 7   | {96, 192, 336, 720} | (34465, 11521, 11521)                                 |
| ETTm2 (Zhou et al., 2021)       | 7   | {96, 192, 336, 720} | (34465, 11521, 11521)                                 |
| Exchange (Wu et al., 2021)      | 8   | {96, 192, 336, 720} | (5120, 665, 1422)                                     |
| Weather (Wu et al., 2021)       | 21  | {96, 192, 336, 720} | (36792, 5271, 10540)                                  |
| ECL (Wu et al., 2021)           | 321 | {96, 192, 336, 720} | (18317, 2633, 5261)                                   |
| Traffic (Wu et al., 2021)       | 862 | {96, 192, 336, 720} | (12185, 1757, 3509)                                   |
| Solar-Energy (Lai et al., 2018) | 137 | {96, 192, 336, 720} | (36601, 5161, 10417)                                  |
| PEMS03 (Liu et al., 2022)       | 358 | {12, 24, 48, 96}    | (15617, 5135, 5135)                                   |
| PEMS04 (Liu et al., 2022)       | 307 | {12, 24, 48, 96}    | (10172, 3375, 3375)                                   |
| PEMS07 (Liu et al., 2022)       | 883 | {12, 24, 48, 96}    | (16911, 5622, 5622)                                   |
| PEMS08 (Liu et al., 2022)       | 170 | {12, 24, 48, 96}    | (10690, 3548, 3548)                                   |

Table A.1: Single-task forecasting datasets.

## A.2 DATASET FOR MULTI-TASK MODEL: UNITS

The datasets used in the experiment are aggregated from the Monash Forecasting Repository (Godahewa et al., 2021), the Time Series Classification Website (Middlehurst et al., 2024), and the Time Series Library (Wu et al., 2023). The combined training set includes more than 35 million time steps and over 6,000 variables (channels). Note that  $N$ ,  $L$ ,  $C$  denote the training size, input length, and number of channels in a dataset, respectively.

### A.2.1 MULTI-TASK LEARNING

For TS forecasting and classification in a multi-task setting, we evaluate the effectiveness of our proposed method using 20 datasets for forecasting and 18 datasets for classification. The statistics of these datasets are summarized in Table A.2 and A.3, respectively.

| Category    | Dataset                    | Prediction Length | $N$          | $L$ | $C$ |
|-------------|----------------------------|-------------------|--------------|-----|-----|
| Finance     | NN5 (Taieb et al., 2012)   | 112               | 409          | 112 | 111 |
|             | Exchange (Wu et al., 2021) | 192<br>336        | 5024<br>4880 | 96  | 8   |
| Electricity | ECL (Wu et al., 2021)      | 96                | 18221        | 96  | 321 |
|             |                            | 192               | 18125        |     |     |
|             |                            | 336               | 17981        |     |     |
|             |                            | 720               | 17597        |     |     |
|             | ETTh1 (Zhou et al., 2021)  | 96                | 8449         | 96  | 7   |
|             |                            | 192               | 8353         |     |     |
|             |                            | 336               | 8209         |     |     |
|             |                            | 720               | 7825         |     |     |
| Illness     | ILI (Wu et al., 2021)      | 60                | 581          | 36  | 7   |
| Traffic     | Traffic (Wu et al., 2021)  | 96                | 12089        | 96  | 862 |
|             |                            | 192               | 11993        |     |     |
|             |                            | 336               | 11849        |     |     |
|             |                            | 720               | 11465        |     |     |
| Weather     | Weather (Wu et al., 2021)  | 96                | 36696        | 96  | 21  |
|             |                            | 192               | 36600        |     |     |
|             |                            | 336               | 36456        |     |     |
|             |                            | 720               | 36072        |     |     |

Table A.2: Multi-task forecasting datasets.

| Category       | Dataset                                       | # classes | $N$  | $L$  | $C$ |
|----------------|-----------------------------------------------|-----------|------|------|-----|
| Finance        | SharePriceIncrease (Dau et al., 2019)         | 2         | 965  | 60   | 1   |
| Audio          | JapaneseVowels (Bagnall et al., 2018)         | 9         | 270  | 29   | 12  |
|                | SpokenArabicDigits (Bagnall et al., 2018)     | 10        | 6599 | 93   | 13  |
|                | Heartbeat (Bagnall et al., 2018)              | 2         | 204  | 405  | 61  |
| ECG            | ECG5000 (Dau et al., 2019)                    | 5         | 500  | 140  | 1   |
|                | NonInvasiveFetalECGThorax1 (Dau et al., 2019) | 52        | 1800 | 750  | 1   |
| EEG            | Blink (Bagnall et al., 2018)                  | 2         | 500  | 510  | 4   |
|                | FaceDetection (Bagnall et al., 2018)          | 2         | 5890 | 62   | 144 |
|                | SelfRegulationSCP2 (Bagnall et al., 2018)     | 2         | 200  | 1152 | 7   |
| Sensors        | ElectricDevices (Dau et al., 2019)            | 7         | 8926 | 96   | 1   |
|                | Trace (Dau et al., 2019)                      | 4         | 100  | 275  | 1   |
|                | FordB (Dau et al., 2019)                      | 2         | 3636 | 500  | 1   |
| Human Activity | MotionSenseHAR (Bagnall et al., 2018)         | 6         | 966  | 200  | 12  |
|                | EMOPain (Bagnall et al., 2018)                | 3         | 968  | 180  | 30  |
|                | UWaveGestureLibrary (Bagnall et al., 2018)    | 8         | 120  | 315  | 3   |
| Traffic        | Chinatown (Dau et al., 2019)                  | 2         | 20   | 24   | 1   |
|                | MelbournePedestrian (Dau et al., 2019)        | 10        | 1194 | 24   | 1   |
|                | PEMS-SF (Bagnall et al., 2018)                | 7         | 267  | 144  | 963 |

Table A.3: Multi-task classification datasets.

## A.2.2 FEW-SHOT LEARNING

For TS forecasting, classification, imputation, and anomaly detection in a few-shot setting, we evaluate the effectiveness of our proposed method using nine datasets for forecasting, six datasets for classification, four datasets for imputation, and five datasets for anomaly detection. The statistics of these datasets related to forecasting and classification are summarized in Table A.4, Table A.5, A.6, and A.7, respectively.

| Category    | Dataset                                 | Prediction Length | $N$   | $L$ | $C$ |
|-------------|-----------------------------------------|-------------------|-------|-----|-----|
| Electricity | ETTh2 (Zhou et al., 2021)               | 96                | 8449  | 96  | 7   |
|             |                                         | 192               | 8353  |     |     |
|             |                                         | 336               | 8209  |     |     |
|             |                                         | 720               | 7825  |     |     |
|             | ETTm1 (Zhou et al., 2021)               | 96                | 34369 | 96  | 7   |
|             |                                         | 192               | 34273 |     |     |
|             |                                         | 336               | 34129 |     |     |
|             |                                         | 720               | 33745 |     |     |
| Weather     | SaugeenRiverFlow (McLeod & Gweon, 2013) | 24                | 18921 | 48  | 1   |

Table A.4: Few-shot forecasting datasets.

| Category       | Dataset                                   | # classes | $N$  | $L$  | $C$ |
|----------------|-------------------------------------------|-----------|------|------|-----|
| ECG            | ECG200 (Dau et al., 2019)                 | 2         | 100  | 96   | 1   |
| EEG            | SelfRegulationSCP1 (Bagnall et al., 2018) | 2         | 268  | 896  | 6   |
| Human Activity | RacketSports (Bagnall et al., 2018)       | 4         | 151  | 30   | 6   |
|                | Handwriting (Bagnall et al., 2018)        | 26        | 150  | 152  | 3   |
|                | Epilepsy (Bagnall et al., 2018)           | 4         | 137  | 207  | 3   |
| Sensor         | StarLightCurves (Dau et al., 2019)        | 3         | 1000 | 1024 | 1   |

Table A.5: Few-shot classification datasets.

| Category    | Dataset                   | $L$ | $C$ |
|-------------|---------------------------|-----|-----|
| Electricity | ETTh1 (Zhou et al., 2021) | 96  | 7   |
|             | ETTh1 (Zhou et al., 2021) | 96  | 7   |
|             | ECL (Wu et al., 2021)     | 96  | 321 |
| Weather     | Weather (Wu et al., 2021) | 96  | 21  |

Table A.6: Few-shot imputation datasets.

| Category       | Dataset                           | $L$ | $C$ |
|----------------|-----------------------------------|-----|-----|
| Machine        | SMD (Su et al., 2019)             | 96  | 38  |
|                | PSM (Abdulaal et al., 2021)       | 96  | 25  |
| Spacecraft     | MSL (Hundman et al., 2018)        | 96  | 55  |
|                | SMAP (Hundman et al., 2018)       | 96  | 25  |
| Infrastructure | SWaT (Mathur & Tippenhauer, 2016) | 96  | 51  |

Table A.7: Few-shot anomaly detection datasets.

### A.2.3 ZERO-SHOT LEARNING

For TS forecasting in a zero-shot setting, we evaluate the effectiveness of our proposed method using six datasets. Three of these datasets are used for the zero-shot setting with unseen datasets, while the remaining four datasets are used for the zero-shot setting with new prediction lengths. The statistics for the three unseen datasets are summarized in Table A.8.

| Category    | Dataset                                 | Prediction Length | $L$ | $C$ |
|-------------|-----------------------------------------|-------------------|-----|-----|
| Electricity | Solar (NREL, 2006)                      | 64                | 128 | 137 |
| Weather     | SaugeenRiverFlow (McLeod & Gweon, 2013) | 128               | 256 | 1   |
| Healthcare  | Hospital (Hyndman et al., 2008)         | 16                | 32  | 767 |

Table A.8: Zero-shot forecasting datasets.

## B IMPLEMENTATION DETAILS

It is important to note that we follow the experimental settings of iTransformer for single-task and UniTS for multi-task settings, respectively. The following sections outline the specific settings we adhered to.

### B.1 IMPLEMENTATION FOR SINGLE-TASK MODEL: iTRANSFORMER

Following iTransformer (Liu et al., 2024a), we use the Adam optimizer (Kinga et al., 2015) and L2 loss for model optimization. The batch size is consistently set to 32, and the number of training epochs is fixed at 10. Since our approach is plug-and-play, we do not adjust any hyperparameters for our method; instead, we use the same hyperparameters employed by iTransformer.

### B.2 IMPLEMENTATION FOR MULTI-TASK MODEL: UniTS

**Model architecture.** In a multi-task setting, the UniTS network consists of three UniTS blocks, along with one GEN tower and one CLS tower. For each data source, specific prompt and task tokens are assigned, with forecasting tasks on the same source but with varying forecast lengths using the same prompt and GEN token. To enable zero-shot learning on new datasets, a shared prompt and GEN token are applied across all data sources. The embedding dimensions are set to 64 for the supervised version, and 32 for the prompt-tuning version, and all blocks in UniTS retain the same feature shape.

**Model training.** In multi-task settings, models are trained jointly on multiple tasks following a unified protocol. To match the largest dataset, samples from each dataset are repeated within each epoch. Supervised training is conducted over 5 epochs with gradient accumulation, yielding an effective batch size of 1024. The initial learning rate is set at  $3.2e-2$  and is adjusted using a multi-step decay schedule. For self-supervised pretraining, the models training with an are trained for 10 epochs with effective batch size of 4096, starting with a learning rate of  $6.4e-3$ , which is adjusted using a cosine decay schedule.

## C APPLICATION TO ITRANSFORMER

To demonstrate the effectiveness of our method on a model with a single-task setting, we apply it to the TS forecasting task using iTransformer (Liu et al., 2024a) on 13 datasets, with the results shown in Table C.1.

| Metric   |      | iTransformer |              | + CM         |              |
|----------|------|--------------|--------------|--------------|--------------|
|          |      | MSE          | MAE          | MSE          | MAE          |
| ETTh1    | 96   | 0.387        | 0.405        | <b>0.385</b> | <b>0.404</b> |
|          | 192  | 0.441        | 0.436        | <b>0.438</b> | <b>0.434</b> |
|          | 336  | 0.491        | 0.462        | <b>0.475</b> | <b>0.454</b> |
|          | 720  | 0.509        | 0.494        | <b>0.477</b> | <b>0.474</b> |
|          | Avg. | 0.457        | 0.449        | <b>0.444</b> | <b>0.441</b> |
| ETTh2    | 96   | 0.301        | 0.350        | <b>0.295</b> | <b>0.347</b> |
|          | 192  | 0.381        | 0.399        | <b>0.380</b> | <b>0.397</b> |
|          | 336  | <b>0.423</b> | <b>0.432</b> | 0.427        | 0.434        |
|          | 720  | <b>0.430</b> | 0.446        | 0.432        | <b>0.445</b> |
|          | Avg. | 0.384        | 0.407        | <b>0.383</b> | <b>0.406</b> |
| ETTm1    | 96   | 0.342        | 0.377        | <b>0.331</b> | <b>0.369</b> |
|          | 192  | 0.383        | 0.396        | <b>0.372</b> | <b>0.390</b> |
|          | 336  | 0.418        | 0.418        | <b>0.412</b> | <b>0.414</b> |
|          | 720  | 0.487        | 0.456        | <b>0.479</b> | <b>0.453</b> |
|          | Avg. | 0.408        | 0.412        | <b>0.398</b> | <b>0.406</b> |
| ETTm2    | 96   | 0.186        | <b>0.272</b> | <b>0.184</b> | <b>0.272</b> |
|          | 192  | 0.254        | 0.314        | <b>0.251</b> | <b>0.311</b> |
|          | 336  | 0.317        | 0.353        | <b>0.312</b> | <b>0.350</b> |
|          | 720  | 0.416        | 0.409        | <b>0.412</b> | <b>0.408</b> |
|          | Avg. | 0.293        | 0.337        | <b>0.289</b> | <b>0.335</b> |
| Exchange | 96   | 0.086        | 0.206        | <b>0.085</b> | <b>0.205</b> |
|          | 192  | 0.181        | 0.303        | <b>0.180</b> | <b>0.302</b> |
|          | 336  | 0.338        | 0.422        | <b>0.337</b> | <b>0.421</b> |
|          | 720  | 0.869        | 0.704        | <b>0.850</b> | <b>0.696</b> |
|          | Avg. | 0.368        | 0.409        | <b>0.363</b> | <b>0.406</b> |
| Weather  | 96   | 0.174        | 0.215        | <b>0.165</b> | <b>0.209</b> |
|          | 192  | 0.224        | 0.258        | <b>0.213</b> | <b>0.251</b> |
|          | 336  | 0.281        | 0.298        | <b>0.274</b> | <b>0.296</b> |
|          | 720  | 0.359        | 0.351        | <b>0.350</b> | <b>0.346</b> |
|          | Avg. | 0.260        | 0.281        | <b>0.250</b> | <b>0.275</b> |
| Solar    | 96   | 0.201        | 0.234        | <b>0.197</b> | <b>0.231</b> |
|          | 192  | 0.238        | 0.263        | <b>0.232</b> | <b>0.260</b> |
|          | 336  | 0.248        | 0.273        | <b>0.241</b> | <b>0.270</b> |
|          | 720  | 0.249        | 0.275        | <b>0.241</b> | <b>0.273</b> |
|          | Avg. | 0.234        | 0.261        | <b>0.228</b> | <b>0.258</b> |

  

| Metric  |      | iTransformer |       | + CM         |              |
|---------|------|--------------|-------|--------------|--------------|
|         |      | MSE          | MAE   | MSE          | MAE          |
| PEMS03  | 12   | 0.071        | 0.174 | <b>0.063</b> | <b>0.168</b> |
|         | 24   | 0.097        | 0.208 | <b>0.087</b> | <b>0.197</b> |
|         | 48   | 0.161        | 0.272 | <b>0.133</b> | <b>0.250</b> |
|         | 96   | 0.240        | 0.338 | <b>0.212</b> | <b>0.316</b> |
|         | Avg. | 0.142        | 0.248 | <b>0.124</b> | <b>0.231</b> |
| PEMS04  | 12   | 0.081        | 0.188 | <b>0.075</b> | <b>0.181</b> |
|         | 24   | 0.099        | 0.211 | <b>0.086</b> | <b>0.196</b> |
|         | 48   | 0.133        | 0.246 | <b>0.108</b> | <b>0.222</b> |
|         | 96   | 0.172        | 0.283 | <b>0.125</b> | <b>0.242</b> |
|         | Avg. | 0.121        | 0.232 | <b>0.098</b> | <b>0.210</b> |
| PEMS07  | 12   | 0.067        | 0.165 | <b>0.061</b> | <b>0.157</b> |
|         | 24   | 0.088        | 0.190 | <b>0.076</b> | <b>0.179</b> |
|         | 48   | 0.113        | 0.218 | <b>0.086</b> | <b>0.188</b> |
|         | 96   | 0.140        | 0.246 | <b>0.104</b> | <b>0.208</b> |
|         | Avg. | 0.102        | 0.205 | <b>0.082</b> | <b>0.183</b> |
| PEMS08  | 12   | 0.088        | 0.193 | <b>0.085</b> | <b>0.190</b> |
|         | 24   | 0.138        | 0.243 | <b>0.126</b> | <b>0.234</b> |
|         | 48   | 0.334        | 0.353 | <b>0.178</b> | <b>0.241</b> |
|         | 96   | 0.458        | 0.436 | <b>0.221</b> | <b>0.260</b> |
|         | Avg. | 0.254        | 0.306 | <b>0.152</b> | <b>0.231</b> |
| ECL     | 96   | 0.148        | 0.240 | <b>0.140</b> | <b>0.235</b> |
|         | 192  | 0.167        | 0.258 | <b>0.158</b> | <b>0.252</b> |
|         | 336  | 0.179        | 0.272 | <b>0.172</b> | <b>0.267</b> |
|         | 720  | 0.220        | 0.310 | <b>0.202</b> | <b>0.295</b> |
|         | Avg. | 0.179        | 0.270 | <b>0.168</b> | <b>0.262</b> |
| Traffic | 96   | 0.395        | 0.268 | <b>0.391</b> | <b>0.266</b> |
|         | 192  | 0.417        | 0.277 | <b>0.409</b> | <b>0.275</b> |
|         | 336  | 0.433        | 0.283 | <b>0.426</b> | <b>0.282</b> |
|         | 720  | 0.467        | 0.300 | <b>0.460</b> | <b>0.300</b> |
|         | Avg. | 0.428        | 0.282 | <b>0.422</b> | <b>0.281</b> |

Table C.1: TS forecasting results with 13 datasets.

## D APPLICATION TO UNITS

To demonstrate the effectiveness of our method on a TS foundation model, we apply it to four different TS tasks using UniTS (Gao et al., 2024) on datasets from various domains, under multiple settings, including multi-task, few-shot, and zero-shot settings. All experimental settings follow those outlined in UniTS (Gao et al., 2024). The sections and tables outlining the full experiment results are listed in Table D.1.

| Settings   | Section | TS downstream tasks |                   |           |            |
|------------|---------|---------------------|-------------------|-----------|------------|
|            |         | FCST                | CLS               | IMP       | AD         |
| Multi-task | D.1     | Table 3             | Table D.2         | -         | -          |
| Few-shot   | D.2     | Table D.3,D.4,D.5   | Table D.6,D.7,D.8 | Table D.9 | Table D.10 |
| Zero-shot  | 4.2.3   | Table 3             | -                 | -         | -          |

Table D.1: Summary of experiments.

### D.1 MULTI-TASK LEARNING

For experiments under multi-task settings, we perform 20 TS forecasting and 18 classification tasks, where the full results are shown in Table 3 and Table D.2, respectively.

| 18 Tasks                   | Shared (1 model)     |                      |                      |                      | Task-specific (18 models) |                      |                      |                      |                      |        |
|----------------------------|----------------------|----------------------|----------------------|----------------------|---------------------------|----------------------|----------------------|----------------------|----------------------|--------|
|                            | UniTS + CM           |                      | UniTS                |                      | iTransformer              | TimesNet             | PatchTST             | Pyraformer           | Autoformer           | GPT4TS |
|                            | Sup.                 | PT                   | Sup.                 | PT                   | Sup.                      |                      |                      |                      |                      | FT     |
| Heartbeat                  | 67.3                 | 70.2                 | 59.0                 | 69.3                 | 66.8                      | <b>72.7</b>          | 65.9                 | <b>72.7</b>          | <a href="#">71.7</a> | 69.8   |
| JapaneseVowels             | 94.1                 | 93.2                 | 93.5                 | 90.8                 | <a href="#">95.9</a>      | <b>97.6</b>          | 94.1                 | 85.4                 | 94.1                 | 94.6   |
| PEMS-SF                    | <a href="#">83.2</a> | 82.1                 | <a href="#">83.2</a> | 85.0                 | <a href="#">83.2</a>      | 77.5                 | <b>83.8</b>          | <a href="#">83.2</a> | 79.2                 | 79.2   |
| SelfRegulationSCP2         | <b>58.3</b>          | 51.7                 | 47.8                 | 53.3                 | 48.9                      | 52.8                 | 48.9                 | <a href="#">56.7</a> | 45.0                 | 45.6   |
| SpokenArabicDigits         | 97.1                 | 93.5                 | 97.5                 | 92.0                 | <a href="#">97.8</a>      | <b>98.7</b>          | 97.5                 | 92.1                 | 97.3                 | 97.5   |
| UWaveGestureLibrary        | <b>84.4</b>          | <a href="#">83.8</a> | 79.1                 | 75.6                 | 82.2                      | <b>84.4</b>          | 81.9                 | 72.2                 | 42.2                 | 81.9   |
| ECG5000                    | <a href="#">93.4</a> | <a href="#">93.4</a> | 92.6                 | <a href="#">93.4</a> | <a href="#">93.3</a>      | 92.6                 | <b>94.3</b>          | 91.4                 | 91.9                 | 93.0   |
| NonInvasiveFetalECGThorax1 | <a href="#">89.5</a> | 55.2                 | <b>90.5</b>          | 27.1                 | 88.2                      | 88.9                 | 86.5                 | 21.4                 | 21.7                 | 89.7   |
| Blink                      | <b>99.1</b>          | <a href="#">95.6</a> | <b>99.1</b>          | 91.1                 | <a href="#">93.3</a>      | 87.6                 | 89.6                 | 88.2                 | 63.1                 | 92.4   |
| FaceDetection              | 64.7                 | 54.6                 | 64.1                 | 57.6                 | 66.0                      | <a href="#">66.2</a> | 63.9                 | <b>67.3</b>          | 59.2                 | 66.1   |
| ElectricDevices            | <a href="#">62.4</a> | 60.5                 | 60.3                 | 55.4                 | 57.3                      | 49.5                 | 59.5                 | <b>65.4</b>          | 56.1                 | 62.9   |
| Trace                      | <b>99.0</b>          | <a href="#">93.0</a> | 91.0                 | 82.0                 | 79.0                      | 91.0                 | 77.0                 | 74.0                 | 60.0                 | 96.0   |
| FordB                      | <b>76.2</b>          | 64.2                 | <a href="#">76.0</a> | 62.8                 | 72.7                      | 68.9                 | 61.4                 | 55.3                 | 66.4                 | 77.7   |
| MotionSenseHAR             | 92.8                 | <b>94.3</b>          | 92.8                 | 93.2                 | <a href="#">93.6</a>      | 90.6                 | 75.8                 | 88.7                 | 30.2                 | 96.2   |
| EMOPain                    | 75.5                 | <a href="#">80.8</a> | 78.0                 | 80.3                 | 79.4                      | 78.0                 | 79.2                 | <b>81.4</b>          | 69.9                 | 79.4   |
| Chinatown                  | <a href="#">97.7</a> | <b>98.0</b>          | <a href="#">97.7</a> | <b>98.0</b>          | 97.4                      | <a href="#">97.7</a> | <a href="#">97.7</a> | 27.4                 | 96.8                 | 96.5   |
| MelbournePedestrian        | <a href="#">89.3</a> | 78.3                 | 87.3                 | 77.0                 | <a href="#">89.3</a>      | <b>95.7</b>          | 80.4                 | 52.3                 | 75.0                 | 94.0   |
| SharePriceIncrease         | 62.9                 | 66.6                 | 61.9                 | <b>68.4</b>          | 61.9                      | 65.0                 | <a href="#">68.0</a> | 63.1                 | 61.5                 | 63.7   |
| 1st Count (/18)            | 5                    | 2                    | 2                    | 2                    | 0                         | 5                    | 2                    | 4                    | 0                    | -      |
| 2nd Count (/18)            | 6                    | 5                    | 3                    | 1                    | 5                         | 2                    | 2                    | 2                    | 1                    | -      |
| Average Score              | <b>82.0</b>          | 78.3                 | 80.6                 | 75.1                 | 80.3                      | <a href="#">80.9</a> | 78.1                 | 68.8                 | 65.6                 | 82.0   |

Table D.2: Results of multi-task classification.

## D.2 FEW-SHOT LEARNING

For the few-shot tasks, we conduct four distinct tasks: forecasting (FCST), classification (CLS), imputation (IMP), and anomaly detection (AD), which are discussed in Sections D.2.1, D.2.2, D.2.3, and D.2.4, respectively.

### D.2.1 FEW-SHOT FORECASTING

The results of few-shot forecasting with data ratios of 5%, 15%, and 20% are shown in Tables D.3, D.4, and D.5, respectively.

| 5%        |     | iTransformer |       | UniTS        |              |              |              | UniTS + CM   |              |              |              |
|-----------|-----|--------------|-------|--------------|--------------|--------------|--------------|--------------|--------------|--------------|--------------|
|           |     | FT           |       | PT           |              | FT           |              | PT           |              | FT           |              |
| Data      | H   | MSE          | MAE   | MSE          | MAE          | MSE          | MAE          | MSE          | MAE          | MSE          | MAE          |
| ETTh2     | 96  | 0.554        | 0.500 | <b>0.405</b> | <b>0.417</b> | <u>0.418</u> | <u>0.424</u> | 0.421        | 0.427        | 0.421        | 0.425        |
|           | 192 | 0.440        | 0.438 | 0.400        | 0.406        | 0.377        | 0.397        | <u>0.386</u> | <u>0.402</u> | <b>0.370</b> | <b>0.389</b> |
|           | 336 | 0.478        | 0.467 | 0.425        | 0.433        | <u>0.420</u> | 0.433        | 0.423        | <u>0.431</u> | <b>0.416</b> | <b>0.425</b> |
|           | 720 | 0.483        | 0.480 | 0.446        | 0.457        | 0.439        | 0.452        | <b>0.424</b> | <u>0.444</u> | <u>0.428</u> | <b>0.443</b> |
| RiverFlow | 24  | 1.141        | 0.514 | 1.115        | 0.504        | <u>1.112</u> | 0.504        | <b>1.097</b> | <u>0.503</u> | <b>1.097</b> | <b>0.500</b> |
| ETTm1     | 96  | 0.504        | 0.462 | 0.436        | 0.434        | <u>0.384</u> | <u>0.404</u> | 0.428        | 0.436        | <b>0.354</b> | <b>0.384</b> |
|           | 192 | 0.555        | 0.485 | 0.462        | 0.448        | <u>0.414</u> | <u>0.418</u> | 0.475        | 0.458        | <b>0.393</b> | <b>0.405</b> |
|           | 336 | 0.567        | 0.496 | 0.560        | 0.494        | <u>0.453</u> | <u>0.442</u> | 0.550        | 0.493        | <b>0.420</b> | <b>0.423</b> |
|           | 720 | 0.659        | 0.539 | 0.703        | 0.558        | <u>0.526</u> | <u>0.483</u> | 0.689        | 0.554        | <b>0.483</b> | <b>0.455</b> |
| Average   |     | 0.598        | 0.487 | 0.549        | 0.461        | <u>0.505</u> | <u>0.440</u> | 0.546        | 0.462        | <b>0.489</b> | <b>0.429</b> |

Table D.3: Results of few-shot forecasting (5%).

| 15%       |     | iTransformer |              | UniTS |       |              |              | UniTS + CM   |              |              |              |
|-----------|-----|--------------|--------------|-------|-------|--------------|--------------|--------------|--------------|--------------|--------------|
|           |     | FT           |              | PT    |       | FT           |              | PT           |              | FT           |              |
| Data      | H   | MSE          | MAE          | MSE   | MAE   | MSE          | MAE          | MSE          | MAE          | MSE          | MAE          |
| ETTh2     | 96  | 0.441        | 0.440        | 0.403 | 0.412 | <b>0.399</b> | <b>0.409</b> | 0.416        | 0.423        | <u>0.403</u> | <u>0.411</u> |
|           | 192 | 0.398        | 0.410        | 0.396 | 0.404 | 0.394        | <u>0.399</u> | <u>0.388</u> | 0.403        | <b>0.387</b> | <b>0.399</b> |
|           | 336 | 0.436        | 0.441        | 0.432 | 0.435 | 0.441        | 0.435        | <b>0.419</b> | <u>0.435</u> | <u>0.430</u> | <b>0.431</b> |
|           | 720 | 0.438        | 0.453        | 0.448 | 0.457 | 0.449        | 0.453        | <b>0.415</b> | <b>0.442</b> | <u>0.433</u> | <u>0.446</u> |
| RiverFlow | 24  | <b>1.067</b> | <b>0.467</b> | 1.077 | 0.492 | <u>1.069</u> | 0.489        | 1.073        | 0.492        | 1.072        | <u>0.487</u> |
| ETTm1     | 96  | 0.423        | 0.419        | 0.407 | 0.420 | <u>0.353</u> | <u>0.386</u> | 0.408        | 0.426        | <b>0.342</b> | <b>0.380</b> |
|           | 192 | 0.464        | 0.439        | 0.434 | 0.432 | <u>0.384</u> | <u>0.400</u> | 0.449        | 0.447        | <b>0.377</b> | <b>0.399</b> |
|           | 336 | 0.492        | 0.457        | 0.490 | 0.464 | <u>0.416</u> | <u>0.420</u> | 0.502        | 0.475        | <b>0.406</b> | <b>0.148</b> |
|           | 720 | 0.558        | 0.493        | 0.641 | 0.537 | <u>0.480</u> | <u>0.455</u> | 0.621        | 0.530        | <b>0.470</b> | <b>0.451</b> |
| Average   |     | 0.524        | 0.450        | 0.525 | 0.450 | <u>0.487</u> | <u>0.428</u> | 0.522        | 0.452        | <b>0.481</b> | <b>0.425</b> |

Table D.4: Results of few-shot forecasting (15%).

| 20%       |     | iTransformer |              | UniTS        |              |              |              | UniTS + CM   |              |              |              |
|-----------|-----|--------------|--------------|--------------|--------------|--------------|--------------|--------------|--------------|--------------|--------------|
|           |     | FT           |              | PT           |              | FT           |              | PT           |              | FT           |              |
| Data      | H   | MSE          | MAE          |
| ETTh2     | 96  | 0.418        | 0.426        | 0.411        | 0.414        | <b>0.391</b> | <b>0.405</b> | 0.411        | 0.422        | <u>0.395</u> | <u>0.409</u> |
|           | 192 | 0.395        | 0.407        | 0.383        | <b>0.398</b> | 0.395        | 0.403        | <b>0.381</b> | <u>0.400</u> | <u>0.390</u> | <u>0.400</u> |
|           | 336 | 0.431        | 0.438        | <b>0.419</b> | <u>0.431</u> | 0.430        | <b>0.430</b> | <u>0.423</u> | <b>0.430</b> | 0.438        | 0.433        |
|           | 720 | <u>0.431</u> | <u>0.449</u> | 0.440        | 0.453        | 0.444        | 0.449        | <b>0.418</b> | <b>0.422</b> | 0.456        | 0.456        |
| RiverFlow | 24  | <b>1.056</b> | <b>0.462</b> | 1.069        | <u>0.487</u> | 1.069        | 0.489        | 1.071        | 0.487        | <u>1.067</u> | 0.489        |
| ETTm1     | 96  | 0.408        | 0.410        | 0.409        | 0.421        | <u>0.344</u> | <u>0.379</u> | 0.403        | 0.425        | <b>0.339</b> | <b>0.376</b> |
|           | 192 | 0.444        | 0.428        | 0.443        | 0.439        | <u>0.377</u> | <u>0.397</u> | 0.450        | 0.450        | <b>0.375</b> | <b>0.396</b> |
|           | 336 | 0.471        | 0.445        | 0.505        | 0.472        | <u>0.408</u> | <u>0.418</u> | 0.507        | 0.481        | <b>0.403</b> | <b>0.415</b> |
|           | 720 | 0.536        | 0.482        | 0.648        | 0.536        | <u>0.472</u> | <u>0.453</u> | 0.621        | 0.531        | <b>0.466</b> | <b>0.448</b> |
| Average   |     | 0.510        | 0.438        | 0.525        | 0.450        | <u>0.486</u> | <u>0.425</u> | 0.521        | 0.453        | <b>0.482</b> | <b>0.425</b> |

Table D.5: Results of few-shot forecasting (20%).

## D.2.2 FEW-SHOT CLASSIFICATION

The results of few-shot classification with data ratios of 5%, 15%, and 20% are shown in Tables D.6, D.7, and D.8, respectively.

| 5%                 | iTransformer | UniTS |             | UniTS + CM  |             |
|--------------------|--------------|-------|-------------|-------------|-------------|
|                    | FT           | PT    | FT          | PT          | FT          |
| ECG200             | <u>78.0</u>  | 67.0  | 77.0        | <b>80.0</b> | 77.0        |
| Handwriting        | <u>5.4</u>   | 4.6   | 4.7         | 4.8         | <b>5.5</b>  |
| SelfRegulationSCP1 | 62.8         | 66.2  | <u>74.7</u> | <b>77.8</b> | 73.7        |
| RacketSports       | 37.5         | 31.6  | 35.5        | <u>39.5</u> | <b>47.4</b> |
| Epilepsy           | 39.9         | 44.9  | <u>47.1</u> | 44.9        | <b>57.2</b> |
| StarLightCurves    | 85.1         | 82.3  | 83.8        | <b>86.3</b> | <u>85.4</u> |
| Average            | 51.4         | 49.4  | 53.8        | <b>54.9</b> | <u>54.8</u> |

Table D.6: Results of few-shot classification (5%).

| 15%                | iTransformer | UniTS |             | UniTS + CM  |             |
|--------------------|--------------|-------|-------------|-------------|-------------|
|                    | FT           | PT    | FT          | PT          | FT          |
| ECG200             | <u>81.0</u>  | 74.0  | 78.0        | 73.2        | <b>82.0</b> |
| Handwriting        | <b>9.8</b>   | 7.3   | 8.1         | <u>9.2</u>  | 8.5         |
| SelfRegulationSCP1 | 67.9         | 59.0  | <b>76.5</b> | <u>69.3</u> | 68.6        |
| RacketSports       | <b>54.6</b>  | 40.1  | 50.7        | 44.7        | <u>51.3</u> |
| Epilepsy           | 41.3         | 52.9  | 58.0        | <u>61.6</u> | <b>68.1</b> |
| StarLightCurves    | 84.2         | 85.8  | <b>87.1</b> | <u>85.9</u> | 85.5        |
| Average            | 56.5         | 53.2  | <u>59.7</u> | 55.4        | <b>60.4</b> |

Table D.7: Results of few-shot classification (15%).

| 20%                | iTransformer | UniTS       |             | UniTS + CM  |             |
|--------------------|--------------|-------------|-------------|-------------|-------------|
|                    | FT           | PT          | FT          | PT          | FT          |
| ECG200             | 81.0         | 76.0        | 77.0        | <b>85.0</b> | <u>82.0</u> |
| Handwriting        | <b>11.8</b>  | 8.0         | 8.5         | 7.6         | <u>9.8</u>  |
| SelfRegulationSCP1 | <u>77.1</u>  | 68.6        | 70.6        | <b>77.8</b> | 74.4        |
| RacketSports       | <u>54.6</u>  | 51.3        | <b>57.9</b> | 38.8        | 50.7        |
| Epilepsy           | 62.3         | <u>81.9</u> | 72.5        | <b>84.1</b> | 61.6        |
| StarLightCurves    | 84.8         | 87.3        | 86.0        | <b>90.0</b> | <u>87.8</u> |
| Average            | 59.9         | 58.9        | <u>63.6</u> | 60.0        | <b>64.8</b> |

Table D.8: Results of few-shot classification (20%).



### D.2.3 FEW-SHOT IMPUTATION

The results of few-shot imputation with data ratios of 25% and 50% are shown in Table D.9

| Ratio |              |              | ECL          | ETTh1        | ETTh2        | ETTh1        | ETTh2        | Weather      | Avg.         |
|-------|--------------|--------------|--------------|--------------|--------------|--------------|--------------|--------------|--------------|
| 25%   | TimesNet     | FT           | 0.245        | 0.369        | 0.193        | 0.442        | 0.119        | 0.106        | 0.246        |
|       | PatchTST     |              | 0.195        | 0.315        | 0.147        | 0.309        | <u>0.092</u> | 0.089        | 0.191        |
|       | iTransformer |              | 0.174        | 0.301        | 0.185        | 0.254        | 0.113        | 0.087        | 0.186        |
|       | UniTS        | PT           | <u>0.139</u> | 0.311        | 0.178        | 0.268        | 0.102        | 0.078        | 0.179        |
|       |              | FT           | 0.160        | <u>0.284</u> | <u>0.150</u> | <u>0.241</u> | <b>0.090</b> | <u>0.077</u> | <u>0.167</u> |
|       | UniTS + CM   | PT           | <u>0.139</u> | 0.310        | 0.176        | 0.262        | 0.100        | 0.078        | 0.179        |
|       |              | FT           | <b>0.129</b> | <b>0.275</b> | <b>0.149</b> | <b>0.231</b> | <b>0.090</b> | <b>0.073</b> | <b>0.158</b> |
|       | 50%          | TimesNet     | 0.258        | 0.412        | 0.211        | 0.607        | 0.140        | 0.125        | 0.292        |
|       |              | PatchTST     | 0.230        | 0.353        | 0.175        | 0.442        | <b>0.111</b> | 0.105        | 0.236        |
|       |              | iTransformer | 0.203        | 0.332        | 0.205        | 0.372        | 0.136        | 0.106        | 0.226        |
|       |              | UniTS        | 0.172        | 0.352        | 0.251        | 0.380        | 0.134        | 0.103        | 0.232        |
|       |              |              | 0.191        | <u>0.322</u> | <u>0.198</u> | <u>0.352</u> | 0.118        | <u>0.095</u> | <u>0.213</u> |
|       |              | UniTS + CM   | <u>0.162</u> | 0.353        | 0.240        | 0.370        | 0.128        | 0.097        | 0.225        |
|       |              |              | <b>0.151</b> | <b>0.307</b> | <b>0.197</b> | <b>0.345</b> | <u>0.116</u> | <b>0.093</b> | <b>0.201</b> |

Table D.9: Results of few-shot imputation.

### D.2.4 FEW-SHOT ANOMALY DETECTION

The results of few-shot anomaly detection with data ratio of 5% are shown in Table D.10.

|                |    | MSL         | PSM         | SMAP        | SMD         | SWAT        | Avg.        |
|----------------|----|-------------|-------------|-------------|-------------|-------------|-------------|
| Anomaly Trans. | -  | 78.0        | 90.2        | 68.3        | 77.8        | 81.5        | 79.2        |
| TimesNet       | FT | 33.9        | 91.0        | 68.5        | 84.0        | <b>93.4</b> | 74.2        |
| iTransformer   | FT | <u>80.4</u> | 96.5        | 67.2        | 82.4        | 89.0        | 83.1        |
| PatchTST       | FT | 79.9        | <u>96.6</u> | 68.7        | 83.8        | 92.6        | 84.3        |
| UniTS          | PT | 73.2        | 95.5        | 65.9        | 81.2        | <u>92.9</u> | 81.7        |
|                | FT | <b>81.3</b> | <b>97.3</b> | <u>71.6</u> | <u>85.5</u> | 92.5        | <u>85.6</u> |
| UniTS + CM     | PT | 73.7        | 95.5        | 66.0        | 82.0        | <u>92.9</u> | 82.0        |
|                | FT | <b>81.3</b> | <b>97.3</b> | <b>75.9</b> | <b>86.2</b> | 92.6        | <b>86.6</b> |

Table D.10: Results of few-shot anomaly detection.

## E APPLICATION TO TIMESIAM

To demonstrate the effectiveness of our proposed model on TimeSiam (Dong et al., 2024), which uses a self-supervised pretraining framework for TS with Siamese networks, we conduct experiments with two datasets that vary in channel size: Exchange, with a small number of channels (8), and ECL, with a large number of channels (321). Specifically, we apply variants of our method by using the domain parameter only during the fine-tuning stage and during both pretraining and fine-tuning stages. The results, shown in Table E.1, validate both components of our method, with the best performance achieved when using domain parameters at both pretraining and fine-tuning stages.

|                         |           | TimeSiam     |       | + CM         |              |              |              |              |              |
|-------------------------|-----------|--------------|-------|--------------|--------------|--------------|--------------|--------------|--------------|
| Correlation matrix      |           | -            |       | ✓            |              | ✓            |              | ✓            |              |
| Domain parameters       | Pretrain  | -            |       | -            |              | -            |              | ✓            |              |
|                         | Fine-tune | -            |       | -            |              | ✓            |              | ✓            |              |
| Dataset                 | $H$       | MSE          | MAE   | MSE          | MAE          | MSE          | MAE          | MSE          | MAE          |
| Exchange<br>( $C = 8$ ) | 96        | 0.092        | 0.215 | <u>0.089</u> | <b>0.207</b> | <b>0.088</b> | <b>0.207</b> | <b>0.088</b> | <u>0.209</u> |
|                         | 192       | <b>0.182</b> | 0.306 | <b>0.182</b> | <u>0.304</u> | <b>0.182</b> | <b>0.303</b> | <b>0.182</b> | 0.305        |
|                         | 336       | 0.341        | 0.426 | 0.336        | <u>0.422</u> | <u>0.332</u> | <b>0.417</b> | <b>0.329</b> | <b>0.417</b> |
|                         | 720       | 0.806        | 0.679 | 0.792        | 0.670        | <u>0.788</u> | <u>0.668</u> | <b>0.783</b> | <b>0.666</b> |
|                         | Avg.      | 0.356        | 0.407 | 0.350        | 0.401        | <u>0.349</u> | <u>0.399</u> | <b>0.346</b> | <b>0.398</b> |
| ECL<br>( $C = 321$ )    | 96        | 0.147        | 0.239 | <b>0.140</b> | <b>0.236</b> | <b>0.140</b> | <b>0.236</b> | <u>0.141</u> | <u>0.237</u> |
|                         | 192       | 0.162        | 0.253 | <b>0.157</b> | <u>0.251</u> | <b>0.157</b> | <u>0.251</u> | <b>0.157</b> | <b>0.250</b> |
|                         | 336       | 0.175        | 0.269 | <u>0.173</u> | <u>0.268</u> | <u>0.173</u> | <u>0.268</u> | <b>0.172</b> | <b>0.267</b> |
|                         | 720       | 0.215        | 0.304 | <b>0.203</b> | <u>0.297</u> | <b>0.203</b> | <u>0.297</u> | <b>0.203</b> | <b>0.296</b> |
|                         | Avg.      | 0.175        | 0.266 | <b>0.168</b> | <u>0.263</u> | <b>0.168</b> | <u>0.263</u> | <b>0.168</b> | <b>0.262</b> |

Table E.1: Results of TS forecasting with TimeSiam.

## F MASKED CHANNEL PREDICTION

Tables F.1 and F.2 show the results of masked channel prediction for five datasets (Wu et al., 2021; Liu et al., 2022), indicating significant improvement when the CM is applied to iTransformer compared to when it is not used.

| Horizon | Exchange        |              |             | ECL               |              |              |
|---------|-----------------|--------------|-------------|-------------------|--------------|--------------|
|         | Avg. MSE(C1~C8) |              |             | Avg. MSE(C1~C321) |              |              |
|         | iTrans.         | + CM         | Gain(%)     | iTrans.           | + CM         | Gain(%)      |
| 96      | 0.139           | <b>0.138</b> | <b>1.2%</b> | 0.846             | <b>0.526</b> | <b>37.8%</b> |
| 192     | 0.236           | <b>0.232</b> | <b>1.5%</b> | 0.849             | <b>0.563</b> | <b>33.7%</b> |
| 336     | 0.383           | <b>0.374</b> | <b>2.4%</b> | 0.861             | <b>0.594</b> | <b>31.0%</b> |
| 720     | 0.934           | <b>0.917</b> | <b>1.8%</b> | 0.891             | <b>0.741</b> | <b>16.8%</b> |
| Avg.    | 0.423           | <b>0.415</b> | <b>1.8%</b> | 0.862             | <b>0.606</b> | <b>29.7%</b> |

Table F.1: Results of masked channel prediction (Exchange, ECL).

| Horizon | PEMS04            |              |              | PEMS07            |              |              | PEMS08            |              |              |
|---------|-------------------|--------------|--------------|-------------------|--------------|--------------|-------------------|--------------|--------------|
|         | Avg. MSE(C1~C307) |              |              | Avg. MSE(C1~C883) |              |              | Avg. MSE(C1~C170) |              |              |
|         | iTrans.           | + CM         | Gain(%)      | iTrans.           | + CM         | Gain(%)      | iTrans.           | + CM         | Gain(%)      |
| 12      | 0.549             | <b>0.300</b> | <b>45.4%</b> | 0.835             | <b>0.343</b> | <b>58.9%</b> | 0.628             | <b>0.200</b> | <b>68.1%</b> |
| 24      | 0.718             | <b>0.351</b> | <b>51.1%</b> | 0.865             | <b>0.448</b> | <b>48.1%</b> | 0.678             | <b>0.241</b> | <b>64.5%</b> |
| 48      | 0.750             | <b>0.409</b> | <b>45.5%</b> | 1.038             | <b>0.511</b> | <b>50.8%</b> | 1.197             | <b>1.059</b> | <b>11.5%</b> |
| 96      | 0.758             | <b>0.513</b> | <b>32.3%</b> | 1.040             | <b>0.640</b> | <b>38.5%</b> | 1.375             | <b>1.217</b> | <b>11.5%</b> |
| Avg.    | 0.694             | <b>0.393</b> | <b>43.3%</b> | 0.945             | <b>0.486</b> | <b>48.6%</b> | 0.970             | <b>0.679</b> | <b>29.9%</b> |

Table F.2: Results of masked channel prediction (PEMS datasets).
